1 **Title:** Spastin is an essential regulator of male meiosis, acrosome formation, manchette  
2 structure and nuclear integrity

3

4 **Authors:** Samuel R. Cheers<sup>1</sup>, Anne E. O'Connor<sup>1</sup>, Travis K. Johnson<sup>2</sup>, D. Jo Merriner<sup>1</sup>,  
5 Moira K. O'Bryan<sup>1,\*</sup>, Jessica E. M. Dunleavy<sup>1,\*</sup>

6

7 **Affiliations:**

8 <sup>1</sup>School of BioSciences and Bio21 Institute, The University of Melbourne, Parkville, VIC  
9 3010, Australia

10 <sup>2</sup>School of Biological Sciences, Monash University, Clayton, VIC 3800, Australia

11 \*Equal senior authors

12 Contact information: [moira.obryan@unimelb.edu.au](mailto:moira.obryan@unimelb.edu.au) and [Jessica.dunleavy@unimelb.edu.au](mailto:Jessica.dunleavy@unimelb.edu.au)

13

14 **Running title:** Spastin is required for spermatogenesis

15

16 **Summary statement:**

17 We identify an essential role for the microtubule severing enzyme spastin in the regulation of  
18 microtubule dynamics during spermatogenesis.

19

20 **Abstract:**

21 The development and function of male gametes is critically dependent on a dynamic  
22 microtubule network, yet how this is regulated remains poorly understood. We have recently  
23 shown that microtubule severing, via the action of the meiotic AAA ATPase protein clade,  
24 plays a critical role in this process. Here, we sought to elucidate the roles of spastin, an as yet  
25 unexplored member of this clade in spermatogenesis. Using a *Spast*<sup>KO/KO</sup> mouse model, we  
26 reveal that spastin loss resulted in a complete loss of functional germ cells. Spastin plays a  
27 critical role in the assembly and function of the male meiotic spindle, and in its absence,  
28 apoptosis is significantly increased. Consistent with meiotic failure, round spermatid nuclei  
29 were enlarged, indicating aneuploidy, but were still able to enter spermiogenesis. During  
30 spermiogenesis, we observed extreme abnormalities in manchette structure, supernumerary  
31 acrosome formation, and commonly, a loss of nuclear integrity. This work defines a novel  
32 and essential role for spastin in regulating microtubule dynamics during spermatogenesis and  
33 is of potential relevance to patients carrying Spastin variants and to the medically assisted  
34 reproductive technology industry.

35

36 **Keywords:** male infertility, spermatogenesis, microtubule severing, AAA ATPase, hereditary  
37 spastic paraplegia

38

39 **Introduction**

40 Microtubule severing is fundamental to the regulation of microtubule dynamics and is  
41 achieved via members of the meiotic clade of the AAA superfamily ('ATPases associated  
42 with diverse cellular activities'). This group includes the katanins, the fidgetins, and spastin  
43 (SPAST), which all have microtubule severing activity, in addition to VPS4, which has no  
44 known severing function (Frickey and Lupas, 2004). While the utility of microtubule  
45 severing in most mammalian developmental processes is unexplored, critical roles in  
46 neurodevelopment are well established for spastin and the katanins (Ahmad et al., 1999, Chen  
47 et al., 2014, Hu et al., 2014, Tan et al., 2020, Yu et al., 2008, Liu et al., 2021), and in multiple  
48 aspects of male germ cell development, for the katanins (Dunleavy et al., 2021, Dunleavy et  
49 al., 2017, O'Donnell et al., 2012). *SPAST* mutations are the most common cause of hereditary  
50 spastic paraplegia (Hazan et al., 1999). Hereditary spastic paraplegia is caused by progressive  
51 degeneration of neurons in the central nervous system and is characterised by lower limb  
52 stiffness, weakness, and spasticity. *SPAST* mutation is dominant, however, it is still debated  
53 whether disease is caused by haploinsufficiency or by gain-of-function, though it appears an  
54 interplay of both mechanisms is likely (Qiang et al., 2019). Although spastin is expressed in  
55 other tissues, its roles outside the nervous system remain virtually unexplored. Of direct  
56 relevance to this study, spastin is highly expressed in male germ cells.

57

58 As is typical of most members of the meiotic AAA clade, spastin is defined by a highly  
59 conserved AAA domain, an N-terminal microtubule interacting and trafficking (MIT)  
60 domain, and a C-terminal VPS4 domain that has been implicated in oligomerisation (Snider  
61 et al., 2008, Vajjhala et al., 2008, Rigden et al., 2009). The AAA domain confers the ATPase  
62 activity necessary for microtubule severing (Erdmann et al., 1991). Outside the AAA domain,  
63 the MIT domain binds microtubules to increase severing efficiency (Errico et al., 2002, Roll-  
64 Meca and Vale, 2008) and is used for interactions with components of the ESCRT-III  
65 (endosomal sorting complexes required for transport) machinery (Reid et al., 2005, Yang et  
66 al., 2008). Additionally, spastin contains a microtubule-binding domain (MTBD) that is  
67 essential for microtubule severing (White et al., 2007). A unique feature of spastin among the  
68 meiotic AAA clade is the presence of a hydrophobic region at the N-terminal that allows it to  
69 embed within lipid membranes. A second smaller isoform of spastin is ubiquitously  
70 expressed that lacks this N-terminal hydrophobic region and is found throughout the cytosol  
71 of COS7 cells (Claudiani et al., 2005).

72

73 To sever microtubules, ATP-bound spastin subunits assemble into a spiral-shaped  
74 homohexamer around the C-terminal tail of tubulin (Roll-Mecak and Vale, 2008, Sandate et  
75 al., 2019). Upon hydrolysis of ATP, the hexamer changes conformation to a ring and in this  
76 movement tugs upon the tubulin C-terminal tail, removing the tubulin heterodimer from the  
77 microtubule lattice (Roll-Mecak and Vale, 2008, Zehr et al., 2020). The action of spastin and  
78 other microtubule-severing enzymes can lead to microtubule disassembly, the release of  
79 microtubules from nucleation sites, and the generation of short stable seeds of microtubules  
80 for transport to other parts of the cell and/or to nucleate microtubule growth (reviewed in  
81 (McNally and Roll-Mecak, 2018)). Conversely, and perhaps counterintuitively, spastin action  
82 can lead to microtubule stabilisation by removing GDP-associated tubulin heterodimers from  
83 the microtubule lattice, which are then replaced with more stable GTP-associated tubulin  
84 heterodimers (Vemu et al., 2018).

85

86 Cellular functions for spastin include the severing of microtubules at the spindle poles in *D.*  
87 *melanogaster* during mitosis to allow poleward movement of chromosomes (Zhang et al.,  
88 2007), shaping of the endoplasmic reticulum in cultured rat neurons, HEK293 and COS7  
89 cells (Park et al., 2010), development of the axon through microtubule outgrowth in zebrafish  
90 neurons (Wood et al., 2006), and axonal transport in isolated squid axoplasm (Leo et al.,  
91 2017). To date, studies conducted using rodent models have focused solely on brain  
92 development and have identified a role for spastin in neurogenesis, axonal development, and  
93 axonal transport (Ji et al., 2018, Kasher et al., 2009, Jeong et al., 2019).

94

95 Through the MIT domain, spastin is able to interact with components of the ESCRT-III  
96 machinery (Reid et al., 2005, Yang et al., 2008). Through these interactions, spastin is  
97 involved in endosome formation and processing, nuclear envelope reformation, and midbody  
98 abscission during cytokinesis (reviewed in (Migliano et al., 2022)). ESCRT-III recruits  
99 spastin to the midbody during mitotic cytokinesis in HeLa cells to sever the midbody  
100 microtubules and allow the completion of membrane fission (Connell et al., 2009). Similarly,  
101 after cell division in HeLa cells, ESCRT-III recruits spastin to sites on the reforming nuclear  
102 membrane through which microtubules pass. Severing of these microtubules allows for the  
103 sealing of the nuclear membrane (Vietri et al., 2015). Spastin is also required in HeLa cells  
104 and mouse embryonic fibroblasts for endosomal tubulation and fission and correct lysosome



105 function (Allison et al., 2013, Allison et al., 2017). Both of these functions require interaction  
106 with the ESCRT-III components and the ability of spastin to sever microtubules. Finally,  
107 spastin is involved in the movement and metabolism of lipid droplets in HeLa cells, which,  
108 interestingly, requires interaction with ESCRT-III components but not microtubule severing  
109 (Chang et al., 2019, Arribat et al., 2020).

110

111 The development of male germ cells, like that of neurogenesis, is highly dependent on  
112 complex microtubule structures. These include the bipolar spindle and midbody during  
113 mitosis and meiosis, the manchette for sperm head shaping, and the axoneme which forms the  
114 core architecture of the sperm tail. Previous research has shown that spermatogenesis is  
115 critically dependent on microtubule severing through other members of the meiotic group of  
116 AAA proteins, the katanins. KATNAL1 is required for regulation of microtubule dynamics  
117 within the Sertoli cells; the somatic support cells within the seminiferous epithelium of the  
118 testis (Smith et al., 2012). KATNAL2 is required for the suppression of supernumerary  
119 centriole formation and for sperm tail formation, sperm head shaping, and sperm release from  
120 the seminiferous epithelium (Dunleavy et al., 2017). Finally, loss of function of KATNB1,  
121 the regulatory katanin subunit, results in failures in meiosis, as well as in acrosome  
122 formation, sperm head shaping, and several aspects of tail formation (Dunleavy et al., 2021,  
123 O'Donnell et al., 2012). The role of spastin in the development of male germ cells has not yet  
124 been directly tested. However, spastin is highly expressed in the testis (Karlsson et al., 2021),  
125 and, notably, a previous publication reported that homozygous spastin mutant mice were  
126 male sterile, but the biological origin of this phenotype was not investigated (Tarrade et al.,  
127 2006).

128

129 Here, we directly tested the role of spastin in spermatogenesis using a whole-body *Spast*  
130 knockout mouse model in which a truncation occurred after exon 4. We reveal that spastin is  
131 essential for male germ cell development in the mouse and loss of spastin is incompatible  
132 with the production of male germ cells. Our work identifies spastin as a regulator of anaphase  
133 during meiosis, of acrosome biogenesis, and of the sculpting of the sperm head via the  
134 manchette. Interestingly, we also find that spastin plays a critical role in maintaining haploid  
135 germ cell nuclear integrity. Spastin loss leads to male sterility characterized by incomplete  
136 meiotic failure, followed by catastrophic degeneration of the spermatid structure.

137

138 **Results:**

139 **Spastin is required for spermatogenesis and male fertility**

140 To investigate the role of spastin in male germ cell development, we used a whole-animal  
141 *Spast* knockout mouse model (*Spast*<sup>KO/KO</sup>) comprising a trans-NIH Knockout Mouse Project  
142 (KOMP) construct (Fig. 1A) inserted into *Spast* intron 4 (red arrowhead, Fig. 1B,C) designed  
143 to truncate *Spast* mRNA at exon 4. The homozygous presence of the construct resulted in an  
144 89.5% reduction in *Spast* mRNA expression in *Spast*<sup>KO/KO</sup> compared to *Spast*<sup>WT/WT</sup> testes (Fig.  
145 1D). Sequencing of the PCR product confirmed that low levels of *Spast* mRNA containing  
146 sequences from the construct were produced in the *Spast*<sup>KO/KO</sup> mouse. This indicates that, in  
147 common with several other KOMP constructs, a low degree of transcription occurred. Due to  
148 the presence of the construct in the mRNA, it is unlikely that translation would result in  
149 functional spastin. This is the first study to use this construct as a whole-body knockout.  
150 Previous studies using this mouse model generated a tissue-specific conditional knockout  
151 (Magiera et al., 2018, Brill et al., 2016).

152  
153 *Spast*<sup>KO/KO</sup> mice generated from the intercrossing of heterozygous mice were born at the  
154 expected Mendelian frequency. *Spast*<sup>KO/KO</sup> male mice exhibited normal mating behaviour  
155 when partnered with *Spast*<sup>WT/WT</sup> female mice, however they were uniformly male sterile (8.5  
156 pups per copulatory plug in *Spast*<sup>WT/WT</sup> (n=3) versus 0.0 pups in *Spast*<sup>KO/KO</sup> (n=4),  $p =$   
157  $<0.0001$ ). Analysis of the *Spast*<sup>KO/KO</sup> male reproductive tract revealed the complete absence  
158 of sperm. *Spast*<sup>KO/KO</sup> mice had normal body weight, but significantly smaller adult testes  
159 compared to *Spast*<sup>WT/WT</sup> controls (36.7% reduction; Fig. 2A). An analysis of testis daily sperm  
160 production revealed that *Spast*<sup>KO/KO</sup> mice produced 99.4% fewer sperm (Fig. 2B), and their  
161 epididymal sperm content was reduced by 99.7%, compared to *Spast*<sup>WT/WT</sup> controls (Fig. 2C).  
162 Rare cells that were seen in the epididymis of *Spast*<sup>KO/KO</sup> mice were prematurely sloughed  
163 spermatocytes and round spermatids rather than spermatozoa (Fig. 2D,E, blue arrowheads).  
164 This was in stark contrast to *Spast*<sup>WT/WT</sup> epididymides, which were full of spermatozoa (Fig.  
165 2E, cauda).

166  
167 Histological analysis of *Spast*<sup>KO/KO</sup> testes identified multiple abnormalities at various stages of  
168 spermatogenesis. Consistent with premature germ cell sloughing and/or death, large areas of  
169 the seminiferous epithelium were devoid of germ cells and/or exhibited a 'lacy' appearance  
170 in *Spast*<sup>KO/KO</sup> testes, indicative of recent germ cell loss (Fig. 2D, red arrowheads). In the

171 majority of *Spast*<sup>KO/KO</sup> seminiferous tubules, spermatogonia and primary spermatocytes up to  
172 and including prophase I appeared phenotypically normal. The earliest point at which a clear  
173 defect could be seen in the *Spast*<sup>KO/KO</sup> mice was during metaphase of meiosis I. During  
174 meiotic division, cells often displayed misaligned chromosomes and signs of division failure,  
175 resulting in abnormally large round spermatids (Fig. 2D, green arrowheads) or, rarely, bi-  
176 nucleated spermatids (Fig. 3B, orange arrowhead), suggesting that spastin may play a critical  
177 role in meiosis. We also noticed that round spermatids in *Spast*<sup>KO/KO</sup> testes had abnormal  
178 acrosome development and failed to elongate, indicating an essential role for spastin during  
179 the early processes of spermiogenesis.

180

### 181 **Spastin is essential for meiotic spindle formation and function in male germ cells**

182 Consistent with the significant reduction in sperm output, there was a significant increase in  
183 apoptotic germ cells in *Spast*<sup>KO/KO</sup> mice compared to *Spast*<sup>WT/WT</sup> littermates (Fig. S1A). The  
184 increase in apoptosis occurred primarily in metaphase and early anaphase spermatocytes,  
185 suggesting an essential role for spastin in male mammalian meiosis (Fig. S1B,C). Indeed,  
186 detailed analysis of *Spast*<sup>KO/KO</sup> PAS-stained testis sections revealed metaphase spermatocytes  
187 frequently contained misaligned chromosomes (Fig. 3A, green arrowheads), and/or a wider  
188 dispersion of chromosomes at the metaphase plate (Fig. 3A, green arrowhead). These  
189 phenotypes were rarely observed in *Spast*<sup>WT/WT</sup> controls. On average, 39% of meiotic cells in  
190 *Spast*<sup>KO/KO</sup> mice contained misaligned chromosomes and 18% were abnormally dispersed. In  
191 contrast, on average, 6% of meiotic cells in *Spast*<sup>WT/WT</sup> mice were misaligned and 5% were  
192 abnormally dispersed (Fig. 3D). In the *Spast*<sup>KO/KO</sup> germ cells that progressed to anaphase  
193 uneven chromosome segregation was common (Fig. 3B, panel B).

194

195 In *Spast*<sup>WT/WT</sup> testis sections, meiosis I completed in stage XII tubules as expected, and  
196 meiosis I or II spermatocytes were not seen in subsequent stage I tubules (Fig. 3A). In  
197 contrast, in the *Spast*<sup>KO/KO</sup> testis, many pyknotic PAS-positive/caspase-positive metaphase I  
198 and early anaphase I spermatocytes were observed to arrest development in stage XII and  
199 persisted in stage I tubules (Fig. 3A, red arrowheads, Fig. S1B,C) indicative of a meiosis  
200 arrest followed by germ cell loss. Of the *Spast*<sup>KO/KO</sup> germ cells that completed meiosis, many  
201 of the resultant round spermatids were abnormal. In *Spast*<sup>KO/KO</sup> males, round spermatids often  
202 had abnormally large nuclei (Fig. 3B, panels e-g) containing multiple nucleoli, or the  
203 presence of multiple nuclei within the same cell. In contrast, round spermatids from

204 *Spast*<sup>WT/WT</sup> males (Fig. 3B, panel a) had uniformly sized nuclei with a single nucleolus. The  
205 absence of a corresponding number of abnormally small diameter spermatids suggests a  
206 major failure of chromosome segregation involving the collapse of at least two sets of  
207 chromosomes into a single spermatid nucleus (Fig. 3B). An additional unusual phenotype we  
208 frequently observed in *Spast*<sup>KO/KO</sup> mice was a single nucleus crossing the intercellular bridge  
209 between sister round spermatids (Fig. 3B, yellow arrowheads). This phenotype was never  
210 seen in wild-type mice and is suggestive of increased malleability of mutant cells and a  
211 failure of metaphase/anaphase and incomplete cytokinesis. In addition, rare binucleated  
212 spermatids were observed in the *Spast*<sup>KO/KO</sup> mice (Fig. 3B, orange arrowhead). These cells  
213 likely arose as a result of complete anaphase followed by unsuccessful cytokinesis. Neither of  
214 these phenotypes were observed in the round spermatids from *Spast*<sup>WT/WT</sup> mice (Fig. 3B,  
215 panel a).

216

### 217 **Spastin is required for acrosome development**

218 Despite the meiotic disruptions observed in *Spast*<sup>KO/KO</sup> testes, the processes that govern the  
219 morphogenesis of round spermatids into elongated spermatids continued in *Spast*<sup>KO/KO</sup> germ  
220 cells. One of the earliest morphological events is acrosome formation which occurs at the  
221 apical surface of the sperm nucleus. This structure is required for the penetration of the cells  
222 surrounding the oocyte and thus fertilisation. It begins with the production of pro-acrosomal  
223 vesicles in step 2-3 spermatids. In wild-type spermatids these vesicles are transported to the  
224 apical pole of the nucleus where they adhere to the nuclear envelope via the acroplaxome to  
225 form a single acrosomal vesicle (Fig. 4B). During the Golgi phase (step 2-3) of acrosome  
226 development, pro-acrosomal vesicles are solely derived from the Golgi, whereas in the cap  
227 phase of development (step 4-7) both Golgi and endocytic pathway-derived vesicles  
228 progressively enlarge the acrosome as it flattens and spreads to cover the apical half of the  
229 nucleus (Fig. 4B, cap phase) (Pleuger et al., 2020).

230

231 We observed that early round spermatids from *Spast*<sup>KO/KO</sup> males (step 2-3) had PAS-positive  
232 pro-acrosomal vesicles that were ectopically distributed throughout the cytoplasm (Fig. 4A,  
233 black arrowheads). In many spermatids, pro-acrosomal vesicles were observed to adhere to  
234 multiple ectopic sites on the nuclear membrane, including at the caudal pole (Fig. 4A red  
235 arrowheads), suggesting a disruption of the cytoskeletal network required for pro-acrosomal  
236 vesicle transport from the Golgi to the nuclear membrane. Moreover, as spermatids from

237 *Spast*<sup>KO/KO</sup> males developed into cap phase, this resulted in supernumerary acrosomes (Fig.  
238 4B-C, red arrowheads). Additionally, multi-lamellar bodies were frequently observed in  
239 spermatids from *Spast*<sup>KO/KO</sup> mice from cap phase onwards (Fig. 3C, asterisk) indicating the  
240 Golgi apparatus and/or the endocytic pathway may be overactive (Hariri et al., 2000).

241

242 In the acrosome phase of development (step 8-12 spermatids), the acrosome could be seen as  
243 a thin vesicle coating the entire anterior region of the sperm head in spermatids from  
244 *Spast*<sup>WT/WT</sup> males (Fig. 4B, acrosome phase). A similar compacted acrosome phenotype was  
245 seen in the spermatids from *Spast*<sup>KO/KO</sup> males, however, multiple acrosome compartments  
246 were still observed (Fig. 4B, red arrowheads), in addition to a loss of nuclear membrane  
247 integrity (Fig. 4B, green arrowhead). Electron microscopy revealed that docking of acrosomal  
248 vesicles throughout development, starting in the Golgi phase, was associated with an  
249 abnormally deep nuclear membrane invagination in spermatids from *Spast*<sup>KO/KO</sup> males,  
250 suggesting compromised nuclear integrity (Fig. 4B, blue arrowheads).

251

## 252 **Spastin is required for the maintenance of nuclear membrane integrity**

253 One of the more unusual manifestations of spastin loss was a severe disruption to spermatid  
254 nuclear integrity at the onset of nuclear elongation in step 9 (Fig. 5E-L). This phenotype was  
255 never observed in *Spast*<sup>WT/WT</sup> controls (Fig. 5A-D). Nuclear envelope breakages were first  
256 apparent in early elongating spermatids from *Spast*<sup>KO/KO</sup> mice (Fig. 5F, J). At later  
257 developmental stages, the nuclear envelopes of spermatids from *Spast*<sup>KO/KO</sup> males became  
258 increasingly degraded and the mixing of nuclear and cytoplasmic material continued until  
259 they were indistinguishable from each other (Fig. 5E,F,H-L). Ruptured nuclear membranes  
260 were most frequently observed at the caudal pole (Fig. 5J, red arrowhead), and were rarely  
261 seen at the acrosome-covered apical pole, possibly due to a stabilising effect of the acrosome  
262 and/or acroplaxome on the membrane. Alternatively, the pressure applied by the manchette,  
263 which envelops the caudal half of the spermatid from step 8/9 onwards may be a trigger for  
264 rupture. As described in (Lehti and Sironen, 2016), the manchette is a transient microtubule-  
265 based structure that plays a pivotal role in sculpting the distal half of the spermatid nucleus.

266

267 We also noted that DNA condensation was disrupted in spermatids from *Spast*<sup>KO/KO</sup> mice. In  
268 elongated spermatids from *Spast*<sup>WT/WT</sup> mice, the nuclear material became progressively more  
269 electron dense as DNA condensed (Fig. 5, yellow arrowheads). In elongating spermatids

270 from *Spast*<sup>KO/KO</sup> males, DNA condensation was only initiated in isolated regions (Fig. 5,  
271 yellow arrowheads). In the later steps of spermiogenesis, and in contrast to the situation in  
272 wild-type, which was replete with elongating and elongated spermatids, these defects  
273 collectively resulted in most spermatids from *Spast*<sup>KO/KO</sup> males containing no discernible  
274 nucleus (Fig. 5K-L). However, fragments of the nuclear membrane associated with the  
275 acrosome (Fig. 5K) and/or the basal body from which the sperm tail initiates (Fig. 5G, blue  
276 arrowhead) were visible. Consistent with these defects, spermatids from *Spast*<sup>KO/KO</sup> males had  
277 an increase in DNA damage when compared to *Spast*<sup>WT/WT</sup> as assessed by marking  $\gamma$ -H2AX,  
278 an indicator of double stranded DNA breaks (Fig. S2)

279

### 280 **Spastin is required for manchette development and sperm head shaping**

281 Spermatid head shaping is mediated in part by the manchette (reviewed in (Dunleavy et al.,  
282 2019)), a transient structure made up of microtubules that extend caudally from a perinuclear  
283 ring immediately distal to the leading edge of the acrosome. In spermatids from *Spast*<sup>WT/WT</sup>  
284 males, the manchette forms at step 8, and as spermatogenesis progresses, the manchette  
285 moves distally towards the centriole/basal body and the growing sperm tail (Fig. 6B). In  
286 parallel, the perinuclear ring constricts, thus acting to sculpt the distal half of the sperm head  
287 (Fig. 6B, Stage XI). Once sperm head shaping is complete, the manchette is disassembled in  
288 step 14 spermatids (Fig. 6B, Stage II-III).

289

290 In *Spast*<sup>KO/KO</sup> mice, the manchette (marked by  $\alpha$ -tubulin) formed at the appropriate time, but  
291 was phenotypically abnormal (Fig. 6B). Manchette microtubules were observed to over-  
292 accumulate resulting in abnormally wide and dense manchettes suggestive of a role for  
293 spastin in microtubule pruning (Fig. 6B, yellow arrowheads). Consistent with this  
294 interpretation, by step 11, manchettes in *Spast*<sup>KO/KO</sup> males were excessively long compared to  
295 those seen in *Spast*<sup>WT/WT</sup> males (Fig. 6B). Further, manchettes were still present in step 14  
296 spermatids from *Spast*<sup>KO/KO</sup> (stage II-III), while in spermatids from *Spast*<sup>WT/WT</sup> males they  
297 were disassembled (Fig. 6A, stage II-III), indicating that like katanin proteins (Dunleavy et  
298 al., 2021, Dunleavy et al., 2017), spastin influences the dissolution of the manchette. The  
299 absence of spastin resulted in the partial (Fig. 6B green arrowheads) or complete detachment  
300 (Fig. 6B, blue arrowheads) of the manchette from most elongating spermatid nuclei. This  
301 dissociation could be due to the degradation of the nuclear membrane resulting from the  
302 compromised nuclear integrity explored above.



303

304 Previous studies have shown that spastin preferentially severs polyglutamylated tubulin and  
305 that knockout of spastin resulted in an increase of polyglutamylated microtubules (Magiera et  
306 al., 2018, Lacroix et al., 2010). As such, we hypothesised that if spastin were required to  
307 sever manchette microtubules, there would be an increase of polyglutamylated microtubules  
308 in the manchettes of *Spast*<sup>KO/KO</sup> testis sections. To test this, we marked testis sections for  $\alpha$ -  
309 tubulin and polyglutamylated tubulin. In *Spast*<sup>KO/KO</sup> mice, we found not only was manchette  
310 microtubule density increased compared to *Spast*<sup>WT/WT</sup>, but there was an increased  
311 accumulation of polyglutamylated microtubules (Fig. 6D). Collectively, these results strongly  
312 suggest that within male germ cells, spastin severs polyglutamylated microtubules within the  
313 manchette to control the number of microtubules within the manchette and to disassemble the  
314 manchette at the end of spermiogenesis.

315

### 316 **Discussion**

317 Previously, we have shown that spermatogenesis is critically dependent on katanin-mediated  
318 microtubule severing (Dunleavy et al., 2021, Dunleavy et al., 2017, O'Donnell et al., 2012,  
319 Smith et al., 2012). Here, we reveal the microtubule severing protein, spastin, is also essential  
320 for multiple aspects of male germ development, and that its loss is ultimately incompatible  
321 with sperm production (azoospermia), due to meiotic failure followed by a catastrophic loss  
322 of nuclear structure. Our data reveals that spastin is an essential regulator of meiosis, wherein  
323 it regulates metaphase and anaphase spindle function, and cytokinesis. We also reveal spastin  
324 has essential roles in acrosome assembly, in ensuring spermatid nuclear integrity, and in  
325 defining the structure and function of the manchette.

326

327 While no defects were apparent during *Spast*<sup>KO/KO</sup> male germ cell mitosis, our data  
328 establishes spastin as essential for the correct completion of male meiosis in mice. In the  
329 absence of spastin, we found increases in chromosome misalignment at the metaphase plate,  
330 in failed chromosome segregation during anaphase, and in failed or abnormal cytokinesis.  
331 Chromosome misalignment at metaphase could be due to a defect in the regulation of the  
332 length of the microtubules that make up the bipolar spindle.

333

334 During anaphase, the failure of poleward chromosome segregation in *Spast*<sup>KO/KO</sup>  
335 spermatocytes, suggests spastin-mediated microtubule severing is required for the poleward

336 shortening of spindle microtubules. This is consistent with in vitro data from mitosis in *D.*  
337 *melanogaster*, wherein spastin was shown to promote poleward chromosome movement  
338 during anaphase ‘Pacman flux’, by stimulating depolymerisation of microtubule minus-ends  
339 at the spindle pole (Zhang et al., 2007). Of note, this work also identified a parallel role for  
340 the microtubule-severing enzyme fidgetin in severing at the spindle poles during ‘Pacman  
341 flux’ (Zhang et al., 2007). It is thus possible that that in mammals, the fidgetins can  
342 compensate for spastin function during mitosis anaphase, but not in meiosis. Spastin has  
343 previously been found to localise to the spindle poles in HeLa cells, supporting a role of  
344 spastin mediated severing in regulating the bipolar spindle in mammals (Errico et al., 2004).

345

346 The occurrences of binucleated spermatids in the absence of spastin, suggest that spastin-  
347 mediated microtubule severing is required to regulate midbody microtubule abscission during  
348 meiosis. Indeed, this is consistent with data showing spastin severs midbody microtubules  
349 during mitosis in HeLa cells (Connell et al., 2009, Yang et al., 2008, Pisciotanni et al., 2019).  
350 More commonly however, in the absence of spastin we observed a single ‘pinched’ spermatid  
351 nucleus shared by two sister cells across an intercellular bridge. The likely explanation for  
352 this phenotype is that the ‘pinched’ nucleus occurs when there is a failure of anaphase  
353 resulting in a single large round spermatid nucleus, and then cytokinesis proceeds regardless  
354 of the position and size of the nucleus. The role spastin-mediated severing plays in  
355 establishing nuclear integrity may allow these nuclei to be flexible enough for the pinched  
356 phenotype to occur. Interestingly, our previous work identified frequent occurrences of  
357 binucleated spermatids when katanin was lost, but never the ‘pinched’ nuclear phenotype  
358 (Dunleavy et al., 2021) indicating that spastin is essential at additional stages of anaphase  
359 and/or cytokinesis in male meiosis.

360

361 In *Spast*<sup>KO/KO</sup> mice, we observed spermatid nuclei that had compromised membrane integrity.  
362 Compromised nuclear integrity first presented as deep invaginations of the nuclear membrane  
363 caused by the overlying acrosome and progressed to ruptured nuclei after manchette  
364 formation. We predict compromised nuclear integrity was due to the requirement of spastin  
365 and ESCRT-III components for nuclear membrane fission following cell division, as shown  
366 in HeLa cells (Vietri et al., 2015). Specifically, we hypothesise that the progressive loss of  
367 nuclear integrity seen in post-meiotic spermatids is due to the inability of the compromised  
368 nuclear membrane to withstand the pressure produced by the events of spermiogenesis.



369 Consistent with the results of Vietri et al., we observed an increase in DNA double-stranded  
370 breaks in *Spast*<sup>KO/KO</sup> mice after meiosis.

371

372 Our data also reveals spastin is required for the correct localisation and assembly of the  
373 acrosome during development. Without spastin, pro-acrosomal vesicles were mis-trafficked  
374 to the cytoplasm or to ectopic locations on the nuclear envelope. While difficult to see at the  
375 light microscope level, this defect may be due to an increase in the number of microtubules  
376 emanating from the Golgi apparatus throughout the cytoplasm. Therefore, we propose that  
377 spastin is required to prune microtubule tracks not typically used in pro-acrosomal vesicle  
378 trafficking. Consistent with this, previous work on mouse neuronal development found that  
379 spastin is required for the pruning of axon branches during neurogenesis (Brill et al., 2016),  
380 and that microtubule-based axonal transport is disrupted in the absence of spastin (Tarrade et  
381 al., 2006).

382

383 Finally, we reveal that spastin is an essential regulator of manchette microtubule density,  
384 length, and disassembly and manchette-nuclear attachment. Previous research found that  
385 spastin preferentially severs polyglutamylated microtubules (Lacroix et al., 2010, Valenstein  
386 and Roll-Mecak, 2016) and that loss of spastin leads to an increase in polyglutamylated  
387 tubulin (Magiera et al., 2018). Our results support a role for spastin in regulating the  
388 accumulation and length of manchette microtubules as we found an increase in  
389 polyglutamylated microtubules within *Spast*<sup>KO/KO</sup> manchettes. Our previous work identified  
390 that the katanin, KATNAL2 is also important for manchette movement and length, indicating  
391 that a suite of microtubule severing enzymes are required to regulate different aspects of the  
392 manchette (Dunleavy et al., 2017).

393

394 To our knowledge, this is the first time that many *in vitro* phenotypes resulting from a loss of  
395 spastin have been confirmed in an *in vivo* model. We have shown a phenotype consistent with  
396 work showing that spastin is required for the completion of nuclear envelope reformation and  
397 for midbody abscission and have highlighted the biological relevance of these roles during  
398 spermatogenesis. Additionally, aspects of the manchette phenotype observed are unique and  
399 suggest a distinct role for spastin in the regulation of complex microtubule-based structures.  
400 This work has established spastin as a key regulator of microtubule dynamics during  
401 spermatogenesis, and many microtubule-dependent processes are disrupted without its action.

402 Our work provides a better understanding of disrupted cell dynamics in cases of hereditary  
403 spastic paraplegia, increases our understanding of the role of microtubule regulation in  
404 spermatogenesis and may ultimately inform fertility care for patients carrying SPAST loss-  
405 of-function genetic variants.

406

## 407 **Materials and Methods:**

### 408 **Animal ethics statement**

409 All animal procedures were performed with the approval of the Monash University Animal  
410 Experimentation Ethics Committee or the University of Melbourne Ethics Committee and  
411 were consistent with the requirements set out in the Australian National Health and Medical  
412 Research Council (NHMRC) Guidelines on Ethics in Animal Experimentation.

413

### 414 **Mouse model production and phenotypic analysis**

415 The mouse model used for this study was first described in (Brill et al., 2016) where they  
416 showed that spastin was involved in dendritic pruning. In brief, the *Spast*<sup>*tm1a(KOMP)Wtsi*</sup>  
417 targeting vector (PG00198\_Z\_2\_G10) was generated by the trans-NIH Knockout Mouse  
418 Project ([www.komp.org](http://www.komp.org)). The construct contains a splice site acceptor and a poly-adenylation  
419 sequence resulting in truncation following exon 4 (ENSMUSE00000137944) of *Spast*  
420 (ENSMUSG00000024068). Mice were maintained on a C57BL/6 background. Wild-type  
421 littermates (*Spast*<sup>*WT/WT*</sup>) were used as controls for *Spast* knockout mice (*Spast*<sup>*KO/KO*</sup>), and all  
422 male mice used for analysis were adult ( $\geq 10$  weeks of age). Mouse genotypes were identified  
423 from tail biopsies using real-time PCR with probes designed for each allele (Transnetyx,  
424 Cordova, TN). *Spast* mRNA levels in *Spast*<sup>*KO/KO*</sup> mice were tested using qPCR on whole  
425 testis tissue as described below. Protein levels were determined by western blotting of testis  
426 lysates as described below.

427

### 428 **Quantitative qPCR**

429 Whole testes were homogenized, and total RNA was extracted using Trizol reagent (Life  
430 Technologies) and cDNA synthesised using SuperScript III reverse transcriptase (Life  
431 Technologies). To verify the truncation of the *Spast* gene in the *Spast*<sup>*KO/KO*</sup> mouse line, PCR  
432 primer sets were designed that span part of exon 4 and exon 5 (forward 5'-  
433 TAACCTGACATGCCGCAATG-3' and reverse 5'-ACAAACCACTGCAACTAGGC-3').

434 qPCR was performed using SYBR Select Master Mix (Applied Biosystems). Each reaction  
435 was performed in triplicate, and on three biological replicates per genotype, on an Applied  
436 Biosystems QuantStudio 3 real-time PCR system. DNA was denatured at 95°C for two  
437 minutes, followed by 35 cycles of 95°C for 30 seconds and then 60°C for one minute. *Ppia*  
438 was amplified simultaneously as an internal control (forward primer 5'-  
439 CGTCTCCTTCGAGCTGTTT-3' and reverse primer 5'-CCCTGGCACATGAATCCT-3').  
440 All results were normalised to the expression of *Ppia*. Differential expression was analysed  
441 using the  $2\Delta\Delta^{CT}$  method (Livak and Schmittgen, 2001).

442

### 443 **Fertility Characterisation**

444 The fertility of the *Spast*<sup>KO/KO</sup> mouse line was characterised as described in (Houston et al.,  
445 2021). Fertility tests used male mice  $\geq 10$  weeks of age, in which males were mated with two  
446 wild-type females ( $\geq 6$  weeks of age). Females were monitored for copulatory plugs as an  
447 indication of successful mating and the number of pups born per copulatory plug was  
448 recorded. Testis daily sperm production (DSP) and total epididymal sperm content ( $n\geq 3$  mice  
449 / genotype) were determined using the Triton X-100 nuclear solubilisation method described  
450 in (Dunleavy et al., 2021).

451

452 Testes and epididymides were fixed in Bouin's fixative and processed into paraffin for  
453 histological examination. Periodic acid-Schiff (PAS) and haematoxylin staining was used to  
454 visualise male reproductive tract histology ( $n\geq 3$  mice / genotype). Germ cell apoptosis was  
455 evaluated by immunostaining for cleaved Caspases 3 and 9 and counterstaining for  
456 haematoxylin as previously described (O'Bryan et al., 2013). The number of caspase-positive  
457 cells in a minimum of 100 randomly selected seminiferous tubules per mouse was quantified  
458 and statistical analysis was performed as detailed below ( $n = 3$  mice / genotype).

459

### 460 **Transmission electron microscopy**

461 To analyse the ultrastructure of the seminiferous tubules, partially decapsulated testes were  
462 processed for transmission electron microscopy as in (Dunleavy et al., 2021). Ultrathin  
463 sections were cut on a Reichert Jung Ultracut Microtome and placed on 100x100 square  
464 copper grids (ProSciTech). Sections were analysed using a Jeol JEM-1400 Plus transmission

465 electron microscope at the Monash University Ramaciotti Centre for Cryo-Electron  
466 Microscopy (Monash University, Clayton).

467

#### 468 **Antibodies**

469 Primary antibodies used included those against  $\alpha$ -tubulin (T5168, Sigma, ascites fluid, 1 in  
470 5000 and ab4074, Abcam, 1  $\mu\text{g ml}^{-1}$ ) polyglutamylated tubulin B3 (T9822, Sigma, 2  $\mu\text{g ml}^{-1}$ ),  
471  $\gamma\text{H2AX}$  (05-636, Millipore, 0.1  $\mu\text{g ml}^{-1}$ ), cleaved caspase 3 (9664, Cell Signalling, 0.5  $\mu\text{g ml}^{-1}$ )  
472 and cleaved-caspase 9 (9509, Cell Signaling, 1  $\mu\text{g ml}^{-1}$ ). Secondary antibodies included  
473 Alexa Fluor 488 donkey anti-goat (A11055, Invitrogen), Alexa Fluor 555 donkey anti-goat  
474 (A21432, Invitrogen), Alexa Fluor 555 donkey anti-mouse (A31570, Invitrogen), Alexa Fluor  
475 647 donkey anti-mouse (A31571, Invitrogen), Alexa Fluor 647 donkey anti-rabbit (A31573,  
476 Invitrogen). Parallel sections were processed in the absence of a primary antibody to control  
477 for secondary antibody specificity.

478

#### 479 **Immunocytochemistry**

480 Five micrometre sections were cut from paraffin blocks and dewaxed prior to antigen  
481 retrieval by microwaving the sections in 10 mM citrate buffer (pH 6.0) for 16 minutes as  
482 previously described ((Jamsai et al., 2008). For colourimetric immunohistochemistry,  
483 endogenous peroxidase activity was blocked with 3%  $\text{H}_2\text{O}_2$  in  $\text{H}_2\text{O}$  for five minutes, and non-  
484 specific antibody binding was minimised by blocking with CAS block (Invitrogen) for at  
485 least 30 minutes. Primary antibodies were diluted in Dako antibody diluent (S0809, Dako)  
486 and incubated overnight at 4°C. Dako envision polymer Dual link system-HRP (K4063,  
487 Dako) was applied undiluted for one hour at room temperature. Dako liquid DAB+ substrate  
488 chromogen (K3468, Dako) was applied to samples for one minute followed by immediate  
489 submersion in water. Sections were counterstained with haematoxylin then dehydrated and  
490 mounted with DPX (44581, Sigma-Aldrich).

491

492 For immunofluorescence labelling, after dewaxing and antigen retrieval non-specific  
493 antibody binding was minimised by incubating sections in CAS Block (Invitrogen). Primary  
494 antibodies were diluted in Dako antibody diluent (S0809, Dako) and incubated on sections  
495 overnight at 4°C. Secondary antibodies were diluted 1 in 500 in PBS and incubated on  
496 sections at room temperature for one hour. DNA was visualized using 1  $\mu\text{g ml}^{-1}$  4',6-

497 diamidino-2-phenylindole (DAPI, Invitrogen). Acrosomes were visualized using  $0.5 \mu\text{g ml}^{-1}$   
498 lectin peanut agglutinin (PNA) Alexa Fluor 488 conjugate (L21409, Life Technologies).  
499 Sections were mounted under Dako fluorescence mounting medium and glass coverslips  
500 (GM304, Dako).

501

502 Immunofluorescent images were taken with a Leica TCS SP8 confocal microscope (Leica  
503 Microsystems) at the University of Melbourne Biological Optical Microscopy Platform. All  
504 images were taken using the 63x/1.40 HC PL APO CS2 oil immersion objective. Z-stacks of  
505 testis sections were collected at  $0.3\mu\text{m}$  intervals and assembled into maximum intensity  
506 projections in ImageJ were processed using ImageJ 2.1.0.

507

### 508 **Statistics and Reproducibility**

509 Statistical analysis of the germ cell apoptosis data was performed in R version 3.5.1 (R Core  
510 Team, 2014). Generalised linear mixed models (GLM) were used to compare the number of  
511 caspase-positive cells per tubule between genotypes. For each model, Akaike information  
512 criterion (AIC) estimates were used to select the most appropriate error distribution and link  
513 functions (i.e., poisson, negative binomial, zero-inflated poisson, zero-inflated negative  
514 binomial) using the glmer function (lme4 package; (Bates et al., 2015)) and the glmmTMB  
515 function (glmmTMB package; (Brooks et al., 2017)). For all models, a zero-inflated negative  
516 binomial distribution (fitted with glmmTMB, using the ziformula argument) was selected as  
517 the most appropriate error distribution and link function (i.e., had the lowest AIC score).

518

519 All other statistical analysis was performed in GraphPad Prism version 9.3. The statistical  
520 significance of differences between two groups was determined using an unpaired student's T  
521 test, significance was defined as  $p\text{-value} < 0.05$ . For each group a minimum of  $n = 3$   
522 individuals per group were analysed.

523

### 524 **Acknowledgments**

525 We thank the Monash Histology Platform, the Monash Ramaciotti Centre for Cryo-Electron  
526 Microscopy, the Monash Animal Research Platform, and the University of Melbourne  
527 Biological Optical Microscopy Platform for technical support.

528

529 **Competing interests**

530 The authors declare no competing or financial interests.

531

532 **Funding**

533 This research was supported in part by grant from the National Health and Medical Research  
534 Council of Australia (NHMRC, APP1138014) to MKOB. JEMD is supported by a National  
535 Health and Medical Research Council Ideas Grant to MKOB and JEMD (APP1180929). SRC  
536 is supported by an Australian Government Research Training Program Scholarship. TKJ is  
537 supported by NHMRC Ideas (APP1182330) and National Institutes of Health grants  
538 (5U01HG007530-08).

539

540 **References:**

- 541 AHMAD, F. J., YU, W., MCNALLY, F. J. & BAAS, P. W. 1999. An essential role for  
542 katanin in severing microtubules in the neuron. *J Cell Biol*, 145, 305-15.
- 543 ALLISON, R., EDGAR, J. R., PEARSON, G., RIZO, T., NEWTON, T., GUNTHER, S.,  
544 BERNER, F., HAGUE, J., CONNELL, J. W., WINKLER, J., LIPPINCOTT-  
545 SCHWARTZ, J., BEETZ, C., WINNER, B. & REID, E. 2017. Defects in ER-  
546 endosome contacts impact lysosome function in hereditary spastic paraplegia. *J Cell*  
547 *Biol*, 216, 1337-1355.
- 548 ALLISON, R., EDGAR, J. R. & REID, E. 2019. Spastin MIT Domain Disease-Associated  
549 Mutations Disrupt Lysosomal Function. *Front Neurosci*, 13, 1179.
- 550 ALLISON, R., LUMB, J. H., FASSIER, C., CONNELL, J. W., TEN MARTIN, D.,  
551 SEAMAN, M. N., HAZAN, J. & REID, E. 2013. An ESCRT-spastin interaction  
552 promotes fission of recycling tubules from the endosome. *J Cell Biol*, 202, 527-43.
- 553 ARRIBAT, Y., GREPPER, D., LAGARRIGUE, S., QI, T., COHEN, S. & AMATI, F. 2020.  
554 Spastin mutations impair coordination between lipid droplet dispersion and reticulum.  
555 *PLoS Genet*, 16, e1008665.
- 556 BATES, D., MACHLER, M., BOLKER, B. M. & WALKER, S. C. 2015. Fitting Linear  
557 Mixed-Effects Models Using lme4. *Journal of Statistical Software*, 67, 1-48.
- 558 BRILL, M. S., KLEELE, T., RUSCHKIES, L., WANG, M., MARAHORI, N. A., REUTER,  
559 M. S., HAUSRAT, T. J., WEIGAND, E., FISHER, M., AHLES, A., ENGELHARDT,  
560 S., BISHOP, D. L., KNEUSSEL, M. & MISGELD, T. 2016. Branch-Specific  
561 Microtubule Destabilization Mediates Axon Branch Loss during Neuromuscular  
562 Synapse Elimination. *Neuron*, 92, 845-856.
- 563 BROOKS, M. E., KRISTENSEN, K., VAN BENTHEM, K. J., MAGNUSSON, A., BERG,  
564 C. W., NIELSEN, A., SKAUG, H. J., MACHLER, M. & BOLKER, B. M. 2017.  
565 glmmTMB Balances Speed and Flexibility Among Packages for Zero-inflated  
566 Generalized Linear Mixed Modeling. *R Journal*, 9, 378-400.
- 567 CHANG, C. L., WEIGEL, A. V., IOANNOU, M. S., PASOLLI, H. A., XU, C. S., PEALE,  
568 D. R., SHTENGEL, G., FREEMAN, M., HESS, H. F., BLACKSTONE, C. &  
569 LIPPINCOTT-SCHWARTZ, J. 2019. Spastin tethers lipid droplets to peroxisomes  
570 and directs fatty acid trafficking through ESCRT-III. *J Cell Biol*, 218, 2583-2599.
- 571 CHEN, K., YE, Y., JI, Z., TAN, M., LI, S., ZHANG, J., GUO, G. & LIN, H. 2014. Katanin  
572 p60 promotes neurite growth and collateral formation in the hippocampus. *Int J Clin*  
573 *Exp Med*, 7, 2463-70.
- 574 CLAUDIANI, P., RIANO, E., ERRICO, A., ANDOLFI, G. & RUGARLI, E. I. 2005. Spastin  
575 subcellular localization is regulated through usage of different translation start sites  
576 and active export from the nucleus. *Experimental Cell Research*, 309, 358-369.
- 577 CONNELL, J. W., ALLISON, R. & REID, E. 2016. Quantitative Gait Analysis Using a  
578 Motorized Treadmill System Sensitive Detects Motor Abnormalities in Mice  
579 Expressing ATPase Defective Spastin. *PLoS One*, 11, e0152413.
- 580 CONNELL, J. W., LINDON, C., LUZIO, J. P. & REID, E. 2009. Spastin couples  
581 microtubule severing to membrane traffic in completion of cytokinesis and secretion.  
582 *Traffic*, 10, 42-56.
- 583 DUNLEAVY, J. E. M., O'BRYAN, M. K., STANTON, P. G. & O'DONNELL, L. 2019. The  
584 cytoskeleton in spermatogenesis. *Reproduction*, 157, R53-R72.
- 585 DUNLEAVY, J. E. M., O'CONNOR, A. E., OKUDA, H., MERRINER, D. J. & O'BRYAN,  
586 M. K. 2021. KATNB1 is a master regulator of multiple katanin enzymes in male  
587 meiosis and haploid germ cell development. *Development*, 148.



- 588 DUNLEAVY, J. E. M., OKUDA, H., O'CONNOR, A. E., MERRINER, D. J., O'DONNELL,  
589 L., JAMSAI, D., BERGMANN, M. & O'BRYAN, M. K. 2017. Katanin-like 2  
590 (KATNAL2) functions in multiple aspects of haploid male germ cell development in  
591 the mouse. *PLoS Genet*, 13, e1007078.
- 592 ERDMANN, R., WIEBEL, F. F., FLESSAU, A., RYTKA, J., BEYER, A., FROHLICH, K.  
593 U. & KUNAU, W. H. 1991. PAS1, a yeast gene required for peroxisome biogenesis,  
594 encodes a member of a novel family of putative ATPases. *Cell*, 64, 499-510.
- 595 ERRICO, A., BALLABIO, A. & RUGARLI, E. I. 2002. Spastin, the protein mutated in  
596 autosomal dominant hereditary spastic paraplegia, is involved in microtubule  
597 dynamics. *Hum Mol Genet*, 11, 153-63.
- 598 ERRICO, A., CLAUDIANI, P., D'ADDIO, M. & RUGARLI, E. I. 2004. Spastin interacts  
599 with the centrosomal protein NA14, and is enriched in the spindle pole, the midbody  
600 and the distal axon. *Hum Mol Genet*, 13, 2121-32.
- 601 FRICKEY, T. & LUPAS, A. N. 2004. Phylogenetic analysis of AAA proteins. *J Struct Biol*,  
602 146, 2-10.
- 603 HARIRI, M., MILLANE, G., GUIMOND, M. P., GUAY, G., DENNIS, J. W. & NABI, I. R.  
604 2000. Biogenesis of multilamellar bodies via autophagy. *Mol Biol Cell*, 11, 255-68.
- 605 HAZAN, J., FONKNECHTEN, N., MAVEL, D., PATERNOTTE, C., SAMSON, D.,  
606 ARTIGUENAVE, F., DAVOINE, C. S., CRUAUD, C., DURR, A., WINCKER, P.,  
607 BROTTIER, P., CATTOLICO, L., BARBE, V., BURGUNDER, J. M.,  
608 PRUD'HOMME, J. F., BRICE, A., FONTAINE, B., HEILIG, R. & WEISSENBACH,  
609 J. 1999. Spastin, a new AAA protein, is altered in the most frequent form of  
610 autosomal dominant spastic paraplegia. *Nature Genetics*, 23, 296-303.
- 611 HOUSTON, B. J., CONRAD, D. F. & O'BRYAN, M. K. 2021. A framework for high-  
612 resolution phenotyping of candidate male infertility mutants: from human to mouse.  
613 *Hum Genet*, 140, 155-182.
- 614 HU, W. F., POMP, O., BEN-OMRAN, T., KODANI, A., HENKE, K., MOCHIDA, G. H.,  
615 YU, T. W., WOODWORTH, M. B., BONNARD, C., RAJ, G. S., TAN, T. T.,  
616 HAMAMY, H., MASRI, A., SHBOUL, M., AL SAFFAR, M., PARTLOW, J. N.,  
617 AL-DOSARI, M., ALAZAMI, A., ALOWAIN, M., ALKURAYA, F. S., REITER, J.  
618 F., HARRIS, M. P., REVERSADE, B. & WALSH, C. A. 2014. Katanin p80 regulates  
619 human cortical development by limiting centriole and cilia number. *Neuron*, 84, 1240-  
620 57.
- 621 JAMSAI, D., BIANCO, D. M., SMITH, S. J., MERRINER, D. J., LY-HUYNH, J. D.,  
622 HERLIHY, A., NIRANJAN, B., GIBBS, G. M. & O'BRYAN, M. K. 2008.  
623 Characterization of gametogenetin 1 (GGN1) and its potential role in male fertility  
624 through the interaction with the ion channel regulator, cysteine-rich secretory protein  
625 2 (CRISP2) in the sperm tail. *Reproduction*, 135, 751-9.
- 626 JEONG, B., KIM, T. H., KIM, D. S., SHIN, W. H., LEE, J. R., KIM, N. S. & LEE, D. Y.  
627 2019. Spastin Contributes to Neural Development through the Regulation of  
628 Microtubule Dynamics in the Primary Cilia of Neural Stem Cells. *Neuroscience*, 411,  
629 76-85.
- 630 JI, Z., ZHANG, G., CHEN, L., LI, J., YANG, Y., CHA, C., ZHANG, J., LIN, H. & GUO, G.  
631 2018. Spastin Interacts with CRMP5 to Promote Neurite Outgrowth by Controlling  
632 the Microtubule Dynamics. *Dev Neurobiol*, 78, 1191-1205.
- 633 KARLSSON, M., ZHANG, C., MEAR, L., ZHONG, W., DIGRE, A., KATONA, B.,  
634 SJOSTEDT, E., BUTLER, L., ODEBERG, J., DUSART, P., EDFORS, F.,  
635 OKSVOLD, P., VON FEILITZEN, K., ZWAHLEN, M., ARIF, M., ALTAY, O., LI,  
636 X., OZCAN, M., MARDINOGLU, A., FAGERBERG, L., MULDER, J., LUO, Y.,



- 637 PONTEN, F., UHLEN, M. & LINDSKOG, C. 2021. A single-cell type  
638 transcriptomics map of human tissues. *Sci Adv*, 7, eabh2169.
- 639 KASHER, P. R., DE VOS, K. J., WHARTON, S. B., MANSER, C., BENNETT, E. J.,  
640 BINGLEY, M., WOOD, J. D., MILNER, R., MCDERMOTT, C. J., MILLER, C. C.,  
641 SHAW, P. J. & GRIERSON, A. J. 2009. Direct evidence for axonal transport defects  
642 in a novel mouse model of mutant spastin-induced hereditary spastic paraplegia  
643 (HSP) and human HSP patients. *J Neurochem*, 110, 34-44.
- 644 LACROIX, B., VAN DIJK, J., GOLD, N. D., GUIZETTI, J., ALDRIAN-HERRADA, G.,  
645 ROGOWSKI, K., GERLICH, D. W. & JANKE, C. 2010. Tubulin polyglutamylation  
646 stimulates spastin-mediated microtubule severing. *J Cell Biol*, 189, 945-54.
- 647 LEHTI, M. S. & SIRONEN, A. 2016. Formation and function of the manchette and flagellum  
648 during spermatogenesis. *Reproduction*, 151, R43-54.
- 649 LEO, L., WEISSMANN, C., BURNS, M., KANG, M., SONG, Y., QIANG, L., BRADY, S.  
650 T., BAAS, P. W. & MORFINI, G. 2017. Mutant spastin proteins promote deficits in  
651 axonal transport through an isoform-specific mechanism involving casein kinase 2  
652 activation. *Hum Mol Genet*, 26, 2321-2334.
- 653 LIU, Q., ZHANG, G., JI, Z. & LIN, H. 2021. Molecular and cellular mechanisms of spastin  
654 in neural development and disease (Review). *Int J Mol Med*, 48, 218.
- 655 LIVAK, K. J. & SCHMITTGEN, T. D. 2001. Analysis of relative gene expression data using  
656 real-time quantitative PCR and the 2(-Delta Delta C(T)) Method. *Methods*, 25, 402-8.
- 657 MAGIERA, M. M., BODAKUNTLA, S., ZIAK, J., LACOMME, S., MARQUES SOUSA,  
658 P., LÉBOUCHER, S., HAUSRAT, T. J., BOSCH, C., ANDRIEUX, A., KNEUSSEL,  
659 M., LANDRY, M., CALAS, A., BALASTIK, M. & JANKE, C. 2018. Excessive  
660 tubulin polyglutamylation causes neurodegeneration and perturbs neuronal transport.  
661 *EMBO J*, 37.
- 662 MANCUSO, G. & RUGARLI, E. I. 2008. A cryptic promoter in the first exon of the SPG4  
663 gene directs the synthesis of the 60-kDa spastin isoform. *BMC Biol*, 6, 31.
- 664 MCNALLY, F. J. & ROLL-MECAK, A. 2018. Microtubule-severing enzymes: From cellular  
665 functions to molecular mechanism. *J Cell Biol*, 217, 4057-4069.
- 666 MIGLIANO, S. M., WENZEL, E. M. & STENMARK, H. 2022. Biophysical and molecular  
667 mechanisms of ESCRT functions, and their implications for disease. *Current Opinion*  
668 *in Cell Biology*, 75, 102062.
- 669 O'DONNELL, L., RHODES, D., SMITH, S. J., MERRINER, D. J., CLARK, B. J., BORG,  
670 C., WHITTLE, B., O'CONNOR, A. E., SMITH, L. B., MCNALLY, F. J., DE  
671 KRETZER, D. M., GOODNOW, C. C., ORMANDY, C. J., JAMSAI, D. &  
672 O'BRYAN, M. K. 2012. An essential role for katanin p80 and microtubule severing in  
673 male gamete production. *PLoS Genet*, 8, e1002698.
- 674 O'BRYAN, M. K., CLARK, B. J., MCLAUGHLIN, E. A., D'SYLVA, R., O'DONNELL, L.,  
675 WILCE, J. A., SUTHERLAND, J. M., O'CONNOR, A. E., WHITTLE, B.,  
676 GOODNOW, C. C., ORMANDY, C. J. & JAMSAI, D. 2013. RBM5 Is a Male Germ  
677 Cell Splicing Factor and Is Required for Spermatid Differentiation and Male Fertility.  
678 *PLoS Genetics*, 9.
- 679 PARK, S. H., ZHU, P. P., PARKER, R. L. & BLACKSTONE, C. 2010. Hereditary spastic  
680 paraplegia proteins REEP1, spastin, and atlastin-1 coordinate microtubule interactions  
681 with the tubular ER network. *J Clin Invest*, 120, 1097-110.
- 682 PISCIOTTANI, A., BIANCOLILLO, L., FERRARA, M., VALENTE, D., SARDINA, F.,  
683 MONTEONOFRIO, L., CAMERINI, S., CRESCENZI, M., SODDU, S. &  
684 RINALDO, C. 2019. HIPK2 Phosphorylates the Microtubule-Severing Enzyme  
685 Spastin at S268 for Abscission. *Cells*, 8.

- 686 PLEUGER, C., LEHTI, M. S., DUNLEAVY, J. E., FIETZ, D. & O'BRYAN, M. K. 2020.  
687 Haploid male germ cells-the Grand Central Station of protein transport. *Hum Reprod*  
688 *Update*, 26, 474-500.
- 689 QIANG, L., PIERMARINI, E., MURALIDHARAN, H., YU, W., LEO, L., HENNESSY, L.  
690 E., FERNANDES, S., CONNORS, T., YATES, P. L., SWIFT, M., ZHOLUDEVA, L.  
691 V., LANE, M. A., MORFINI, G., ALEXANDER, G. M., HEIMAN-PATTERSON,  
692 T. D. & BAAS, P. W. 2019. Hereditary spastic paraplegia: gain-of-function  
693 mechanisms revealed by new transgenic mouse. *Hum Mol Genet*, 28, 1136-1152.
- 694 REID, E., CONNELL, J., EDWARDS, T. L., DULEY, S., BROWN, S. E. & SANDERSON,  
695 C. M. 2005. The hereditary spastic paraplegia protein spastin interacts with the  
696 ESCRT-III complex-associated endosomal protein CHMP1B. *Hum Mol Genet*, 14,  
697 19-38.
- 698 RIGDEN, D. J., LIU, H., HAYES, S. D., URBE, S. & CLAGUE, M. J. 2009. Ab initio  
699 protein modelling reveals novel human MIT domains. *FEBS Lett*, 583, 872-8.
- 700 ROLL-MECAK, A. & VALE, R. D. 2008. Structural basis of microtubule severing by the  
701 hereditary spastic paraplegia protein spastin. *Nature*, 451, 363-7.
- 702 SANDATE, C. R., SZYK, A., ZEHR, E. A., LANDER, G. C. & ROLL-MECAK, A. 2019.  
703 An allosteric network in spastin couples multiple activities required for microtubule  
704 severing. *Nat Struct Mol Biol*, 26, 671-678.
- 705 SMITH, L. B., MILNE, L., NELSON, N., EDDIE, S., BROWN, P., ATANASSOVA, N.,  
706 O'BRYAN, M. K., O'DONNELL, L., RHODES, D., WELLS, S., NAPPER, D.,  
707 NOLAN, P., LALANNE, Z., CHEESEMAN, M. & PETERS, J. 2012. KATNAL1  
708 Regulation of Sertoli Cell Microtubule Dynamics Is Essential for Spermiogenesis and  
709 Male Fertility. *Plos Genetics*, 8.
- 710 SNIDER, J., THIBAUT, G. & HOURY, W. A. 2008. The AAA+ superfamily of  
711 functionally diverse proteins. *Genome Biol*, 9, 216.
- 712 TAN, D., ZHANG, H., DENG, J., LIU, J., WEN, J., LI, L., WANG, X., PAN, M., HU, X. &  
713 GUO, J. 2020. RhoA-GTPase Modulates Neurite Outgrowth by Regulating the  
714 Expression of Spastin and p60-Katanin. *Cells*, 9.
- 715 TARRADE, A., FASSIER, C., COURAGEOT, S., CHARVIN, D., VITTE, J., PERIS, L.,  
716 THOREL, A., MOUISEL, E., FONKNECHTEN, N., ROBLLOT, N., SEILHEAN, D.,  
717 DIERICH, A., HAUW, J. J. & MELKI, J. 2006. A mutation of spastin is responsible  
718 for swellings and impairment of transport in a region of axon characterized by  
719 changes in microtubule composition. *Hum Mol Genet*, 15, 3544-58.
- 720 VAJJHALA, P. R., NGUYEN, C. H., LANDSBERG, M. J., KISTLER, C., GAN, A. L.,  
721 KING, G. F., HANKAMER, B. & MUNN, A. L. 2008. The Vps4 C-terminal helix is  
722 a critical determinant for assembly and ATPase activity and has elements conserved  
723 in other members of the meiotic clade of AAA ATPases. *FEBS J*, 275, 1427-1449.
- 724 VALENSTEIN, M. L. & ROLL-MECAK, A. 2016. Graded Control of Microtubule Severing  
725 by Tubulin Glutamylation. *Cell*, 164, 911-21.
- 726 VEMU, A., SZCZESNA, E., ZEHR, E. A., SPECTOR, J. O., GRIGORIEFF, N.,  
727 DEACONESCU, A. M. & ROLL-MECAK, A. 2018. Severing enzymes amplify  
728 microtubule arrays through lattice GTP-tubulin incorporation. *Science*, 361.
- 729 VIETRI, M., SCHINK, K. O., CAMPSTEIJN, C., WEGNER, C. S., SCHULTZ, S. W.,  
730 CHRIST, L., THORESEN, S. B., BRECH, A., RAIBORG, C. & STENMARK, H.  
731 2015. Spastin and ESCRT-III coordinate mitotic spindle disassembly and nuclear  
732 envelope sealing. *Nature*, 522, 231-5.

- 733 WHITE, S. R., EVANS, K. J., LARY, J., COLE, J. L. & LAURING, B. 2007. Recognition of  
734 C-terminal amino acids in tubulin by pore loops in Spastin is important for  
735 microtubule severing. *J Cell Biol*, 176, 995-1005.
- 736 WOOD, J. D., LANDERS, J. A., BINGLEY, M., MCDERMOTT, C. J., THOMAS-  
737 MCARTHUR, V., GLEADALL, L. J., SHAW, P. J. & CUNLIFFE, V. T. 2006. The  
738 microtubule-severing protein Spastin is essential for axon outgrowth in the zebrafish  
739 embryo. *Hum Mol Genet*, 15, 2763-71.
- 740 YANG, D., RISMANCHI, N., RENVOISE, B., LIPPINCOTT-SCHWARTZ, J.,  
741 BLACKSTONE, C. & HURLEY, J. H. 2008. Structural basis for midbody targeting  
742 of spastin by the ESCRT-III protein CHMP1B. *Nat Struct Mol Biol*, 15, 1278-86.
- 743 YU, W., QIANG, L., SOLOWSKA, J. M., KARABAY, A., KORULU, S. & BAAS, P. W.  
744 2008. The microtubule-severing proteins spastin and katanin participate differently in  
745 the formation of axonal branches. *Mol Biol Cell*, 19, 1485-98.
- 746 ZEHR, E. A., SZYK, A., SZCZESNA, E. & ROLL-MECAK, A. 2020. Katanin Grips the  
747 beta-Tubulin Tail through an Electropositive Double Spiral to Sever Microtubules.  
748 *Dev Cell*, 52, 118-131 e6.
- 749 ZHANG, D., ROGERS, G. C., BUSTER, D. W. & SHARP, D. J. 2007. Three microtubule  
750 severing enzymes contribute to the "Pacman-flux" machinery that moves  
751 chromosomes. *Journal of Cell Biology*, 177, 231-242.
- 752

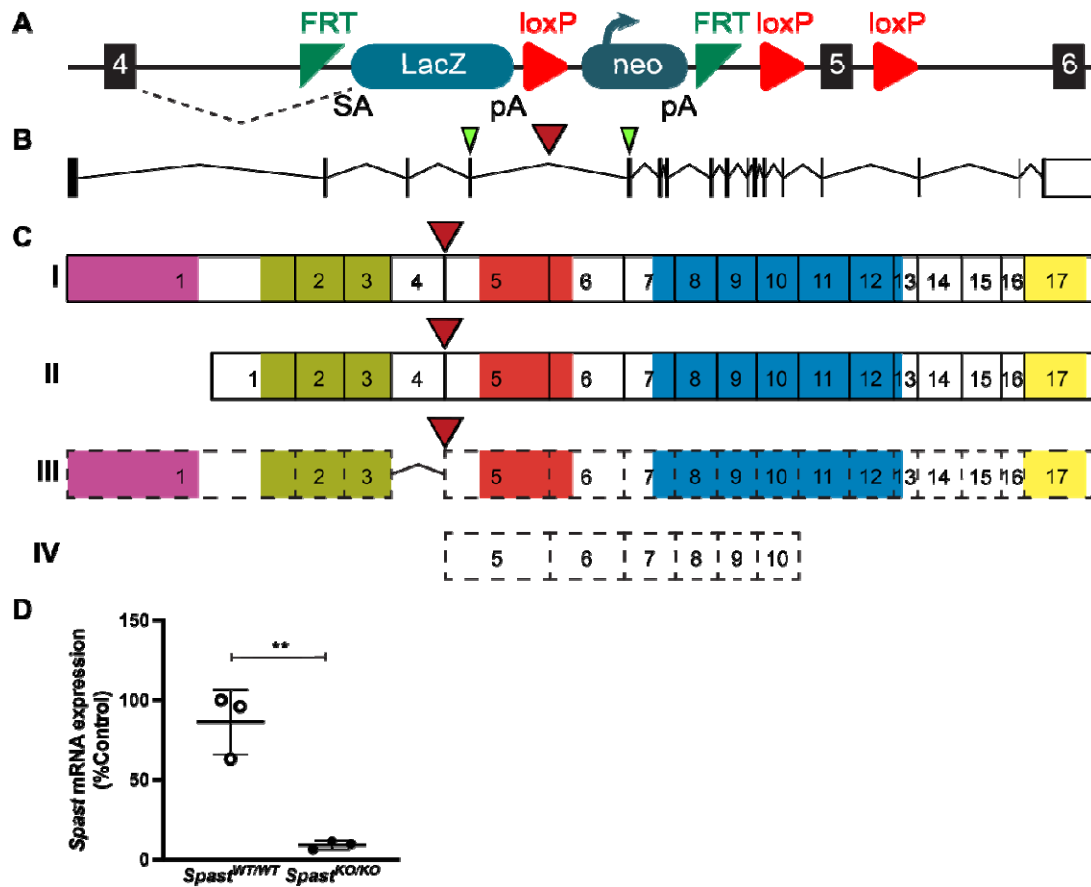

753

754 **Fig. 1: Ablation of spastin function in *Spast*<sup>KO/KO</sup> mice.** (A) The *Spast* KO-first conditional  
 755 ready allele. The FRT-lacZ-loxP-neo-FRT-loxP-*Spast* exon 5-loxP cassette was inserted into  
 756 *Spast* intron 4. (B) Schematics of the murine *Spast* gene and (C) SPAST protein. The red  
 757 arrow indicates the point of cassette insertion. The green arrowheads indicate the target  
 758 regions of the qPCR primers. The hydrophobic region, MIT domain, MTBD domain, AAA  
 759 ATPase domain, and VPS4 oligomerisation domain are shown in pink, green, red, blue, and  
 760 yellow, respectively. Two *Spast* isoforms M1 (I) and M87 (II) have been characterised in  
 761 mice (Mancuso and Rugarli, 2008). Two additional *Spast* isoforms (III, IV), that are yet to be  
 762 validated, are predicted (Uniprot, A0A286YCJ4 and A0A3B2WBA7). (D) qPCR analysis of  
 763 *Spast* transcript levels in the *Spast*<sup>WT/WT</sup> and *Spast*<sup>KO/KO</sup> whole testes (n= 3 mice/genotype).  
 764 Lines represent the mean ± SD and are normalised to the expression of *Ppia*. \*\**P* = 0.0028.

765



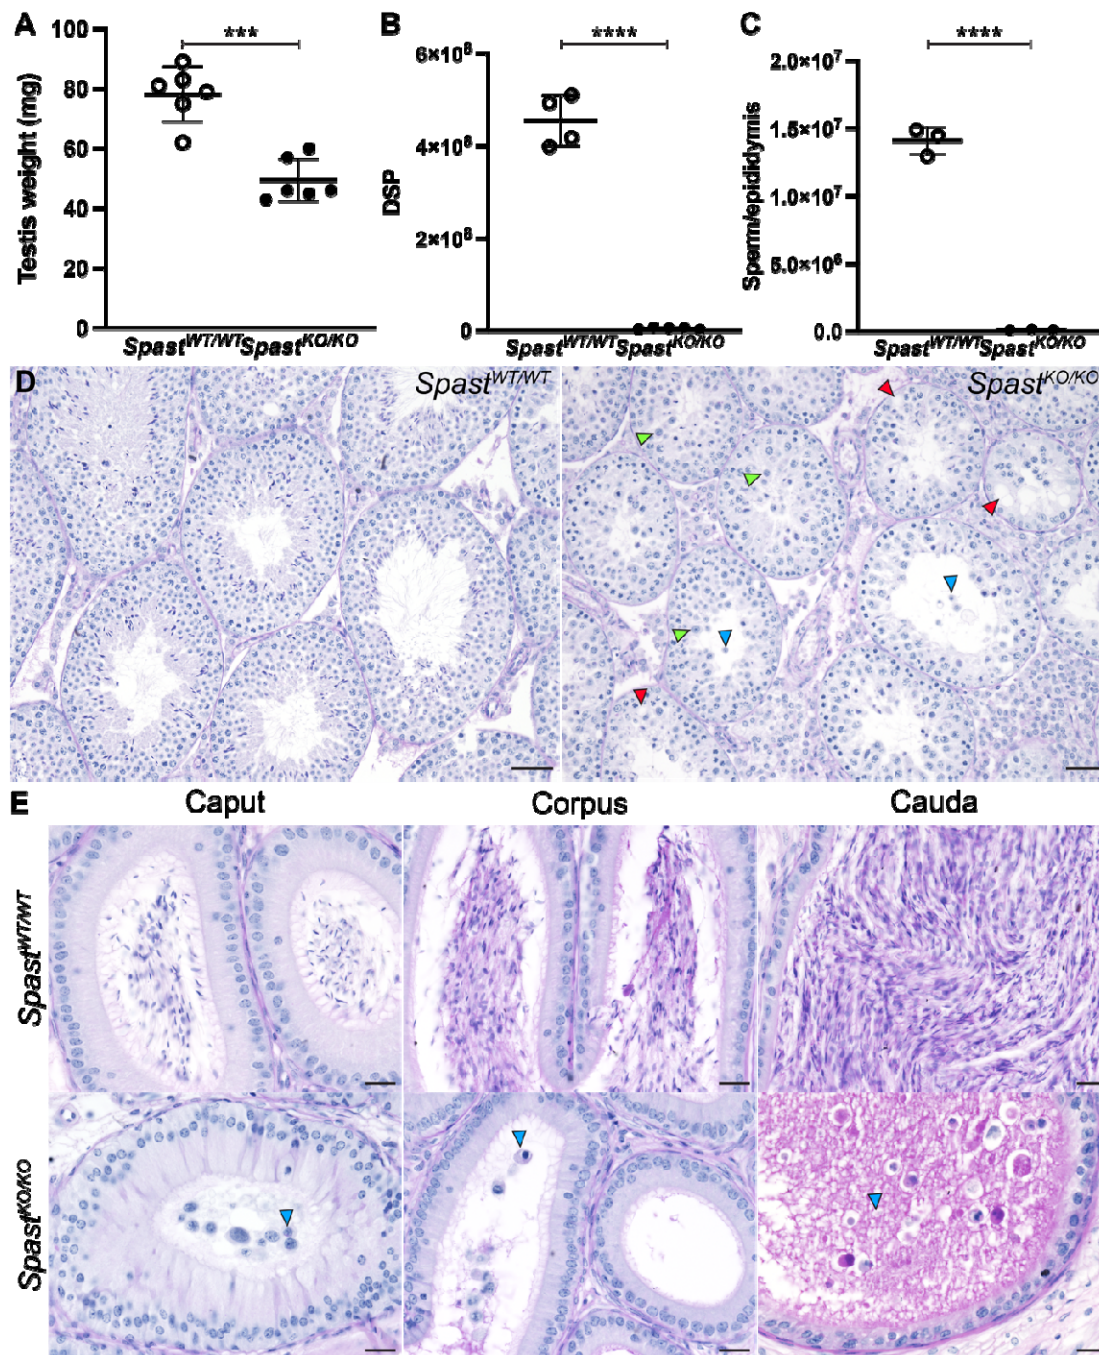

766  
767 **Fig. 2: Spermatogenic defects due to knockout of *Spast*.** (A) Testis weight, (B) total daily  
768 sperm production (DSP) per testis, and (C) epididymal sperm content in *Spast*<sup>KO/KO</sup> mice  
769 (black circles) compared to *Spast*<sup>WT/WT</sup> (white circles) controls (n≥3 mice/genotype, lines  
770 represent mean ± SD). Asterisks denote different levels of significance; \*\*\* p= 0.0001, \*\*\*\*  
771 p< 0.0001. (D) PAS-stained testis sections from *Spast*<sup>WT/WT</sup> and *Spast*<sup>KO/KO</sup> mice. Red  
772 arrowheads indicate vacuoles in the seminiferous epithelium. The green arrowheads indicate  
773 abnormally large round spermatids. Blue arrowheads indicate prematurely released germ

774 cells. Scale bars = 50 $\mu$ m. (E) Epididymis sections from *Spast*<sup>WT/WT</sup> and *Spast*<sup>KO/KO</sup> mice. Blue  
775 arrowheads indicate prematurely released germ cells. Scale bars = 20  $\mu$ m.

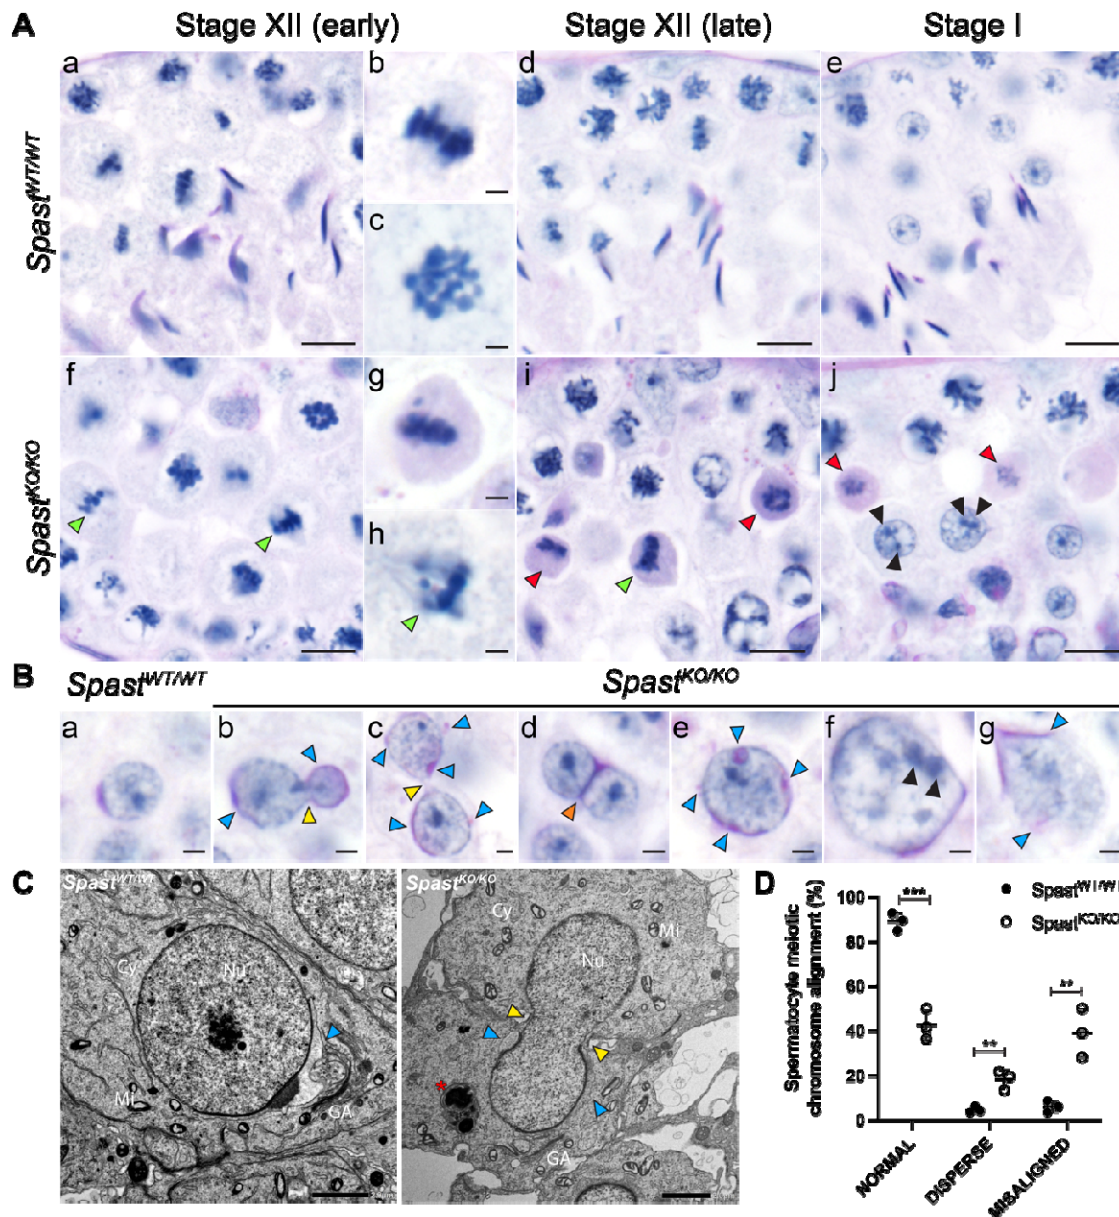

776

777 **Fig. 3: Spastin is essential for correct meiotic division.** (A) PAS-stained testis sections  
 778 from *Spast*<sup>KO/KO</sup> mice had an increase in pyknotic spermatocytes (red arrows) in stage XII and  
 779 I tubules. The green arrowheads indicate wide dispersion or misalignment of chromosomes.  
 780 The black arrowheads indicate multiple nucleoli within abnormally large nuclei. Panels **b-c**  
 781 and **g-h** show meiotic cells at increased magnification. Scale bars in **a, d-f, i-j** = 10 μm. Scale  
 782 bars in **b-c, g-h** = 2 μm. (B) The meiosis abnormalities resulted in round spermatids with  
 783 abnormal phenotypes, including sister cells sharing a single nucleus, which crossed the  
 784 intercellular bridge (yellow arrowheads), binucleated spermatids (orange arrowhead), and  
 785 abnormally large nuclei (e-g). Multiple, or fragmented, acrosomes are also indicated by blue



786 arrowheads. Scale bars in **a-g** = 2  $\mu$ m. **(C)** Failure of meiosis resulting in a nucleus crossing  
787 the intercellular bridge between two daughter cells. The position of the intercellular bridge is  
788 indicated by yellow arrowheads; the position of the acrosome is indicated by blue  
789 arrowheads. The asterisk indicates what is likely to be a late-stage multilamellar body, which  
790 may have formed due to an overactive Golgi-apparatus or due to the over-activation of  
791 phagocytic pathways. This structure was frequently observed in *Spast*<sup>KO/KO</sup> mice but was not  
792 observed in *Spast*<sup>WT/WT</sup> mice. Cytoplasm, Cy; Golgi apparatus, GA; Mitochondrion, Mi;  
793 Nucleus, Nu. Scale bars = 2  $\mu$ m. **(D)** Quantification of common phenotypic defects seen in  
794 meiosis in *Spast*<sup>KO/KO</sup> mice (black circles) compared to *Spast*<sup>WT/WT</sup> (white circles) controls  
795 (n=3/genotype, lines represent mean  $\pm$  SD). Asterisks denote different levels of significance;  
796 \*\* p< 0.01, \*\*\* p< 0.001.  
797



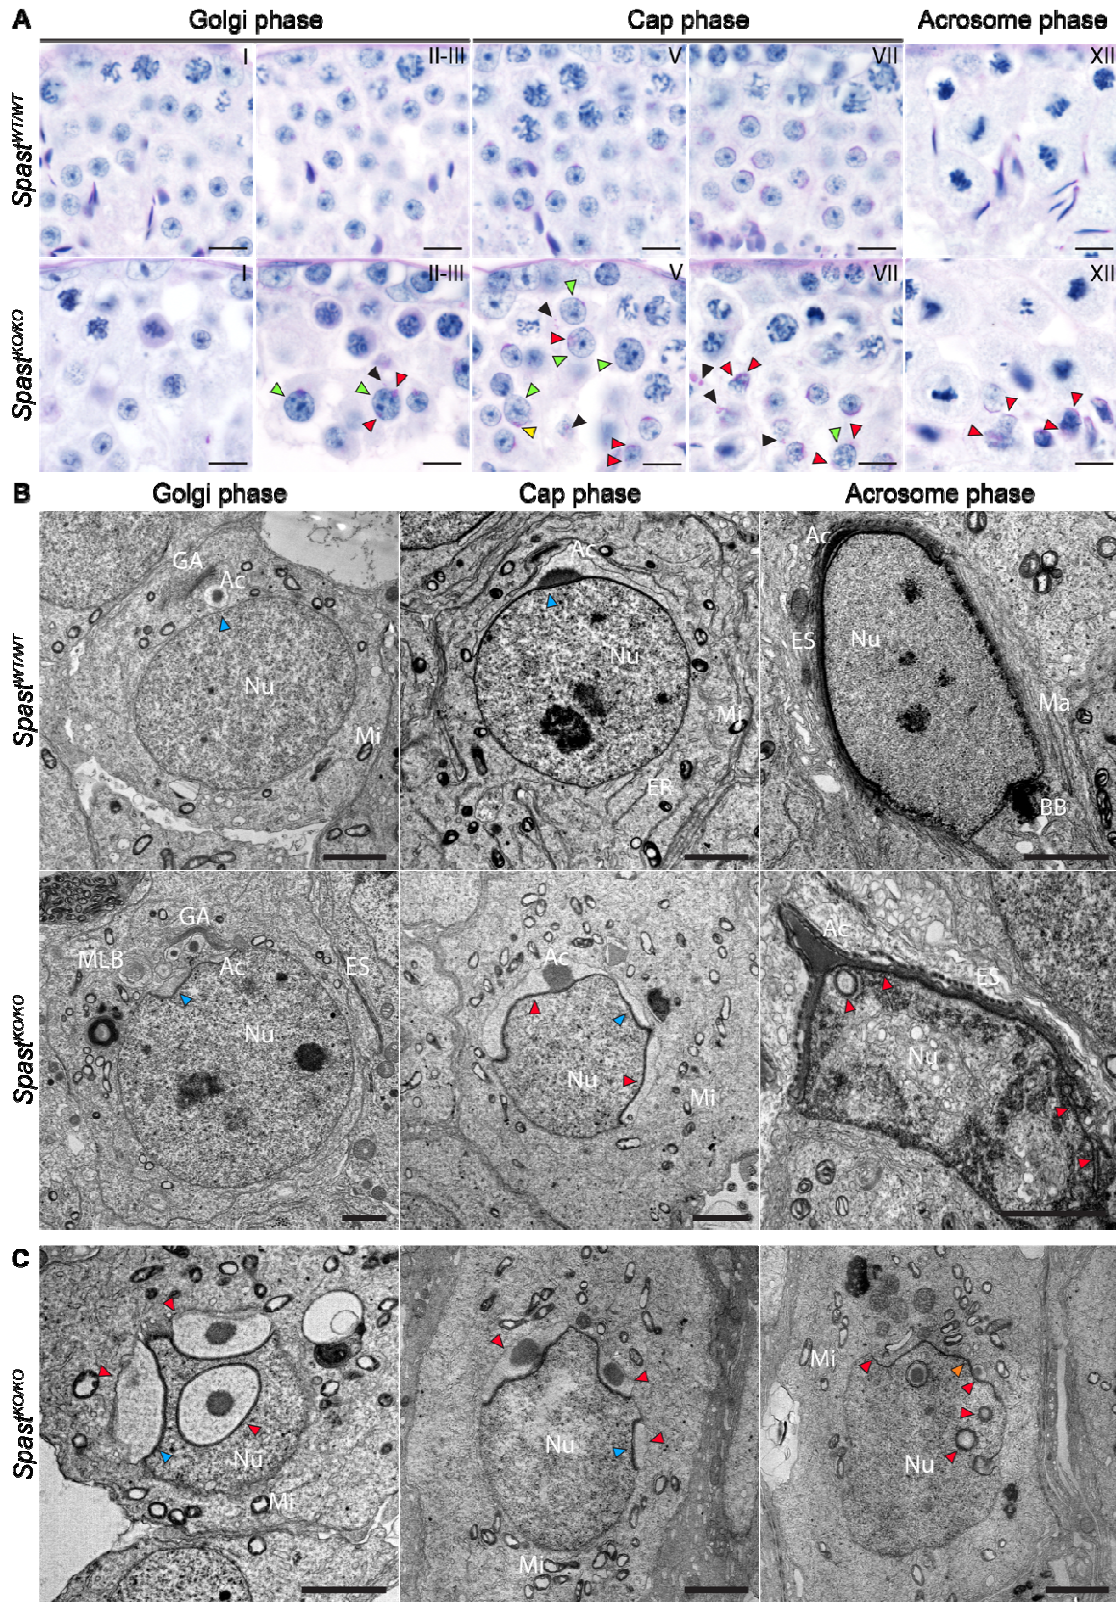

798

799

800

**Fig. 4: Spastin is essential for the formation of the acrosome.** (A) The absence of spastin resulted in multiple defects during acrosome development as observed in PAS-stained testis

801 sections. Red arrowheads indicate the presence of multiple pro-acrosomal vesicles, with some  
802 having an abnormal localisation within the cytoplasm and others being incorrectly localised  
803 at the nucleus. The yellow arrowhead indicates an acrosomal vesicle developing on a nucleus  
804 traversing the intercellular bridge, and green arrowheads indicate overtly abnormally large  
805 spermatid nuclei. Roman numerals indicate seminiferous tubule stage. Scale bars = 10  $\mu\text{m}$ .  
806 **(B)** and **(C)** Transmission electron microscopy showing the ultrastructure of the acrosome in  
807 spermatids from *Spast*<sup>WT/WT</sup> and *Spast*<sup>KO/KO</sup> males. In **(B)** progressive steps of acrosome  
808 development are shown from left to right. The blue arrowheads indicate an abnormal  
809 invagination of the nuclear membrane below the developing acrosomal granules, and lack of  
810 this invagination in the *Spast*<sup>WT/WT</sup> mice. Red arrowheads indicate sites of supernumerary  
811 acrosome formation. Orange arrowhead indicates abnormal nuclear membrane morphology in  
812 the absence of the acrosomal vesicle. Acrosome, Ac; Ectoplasmic specialisation, ES; Golgi  
813 Apparatus, GA; Manchette, Ma; Mitochondria, Mi; Multilamellar Body, MLB; Nucleus, Nu.  
814 Scale bars = 2  $\mu\text{m}$ .



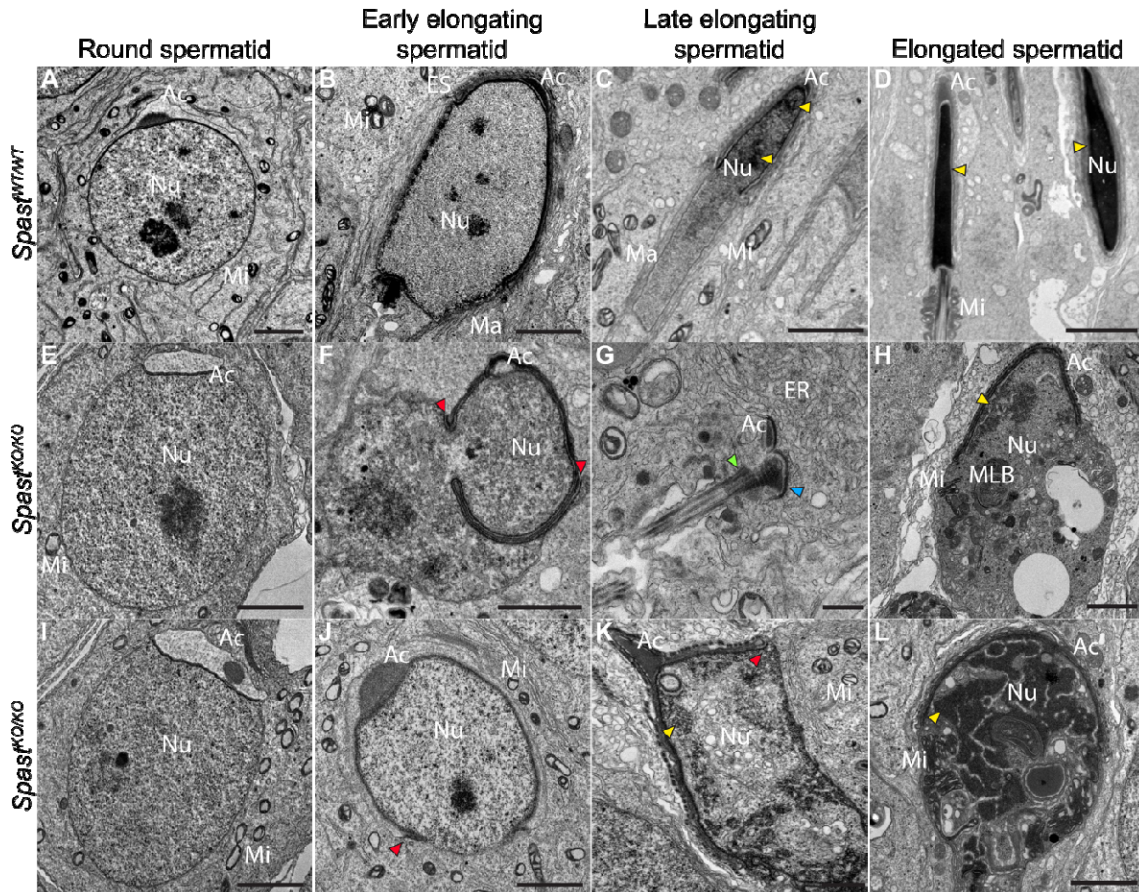

815

816 **Fig. 5: Spastin is required for the maintenance of spermatid nuclear membrane**  
817 **integrity.** Transmission electron microscopy of developing spermatids from *Spast*<sup>WT/WT</sup> and  
818 *Spast*<sup>KO/KO</sup> mice. In *Spast*<sup>KO/KO</sup> mice, following the initiation of spermatid elongation,  
819 spermatids presented with a loss of nuclear membrane integrity ultimately resulting in cell  
820 death and a virtual absence of sperm. Red arrowheads indicate the site of membrane rupture.  
821 Blue arrowhead indicates the basal plate of the head-tail coupling apparatus. Yellow  
822 arrowheads indicate condensed DNA. The green arrowhead indicates the basal body, and the  
823 blue arrowhead indicates the associated nuclear membrane. Acrosome, Ac; Endoplasmic  
824 reticulum, ER; Ectoplasmic specialisation, ES; Manchette, Ma; Mitochondria, Mi;  
825 Multilamellar Body, MLB; Nucleus, Nu. Scale bars **A-F, H-L** = 2  $\mu$ m. Scale bar **G** = 500  
826 nm.



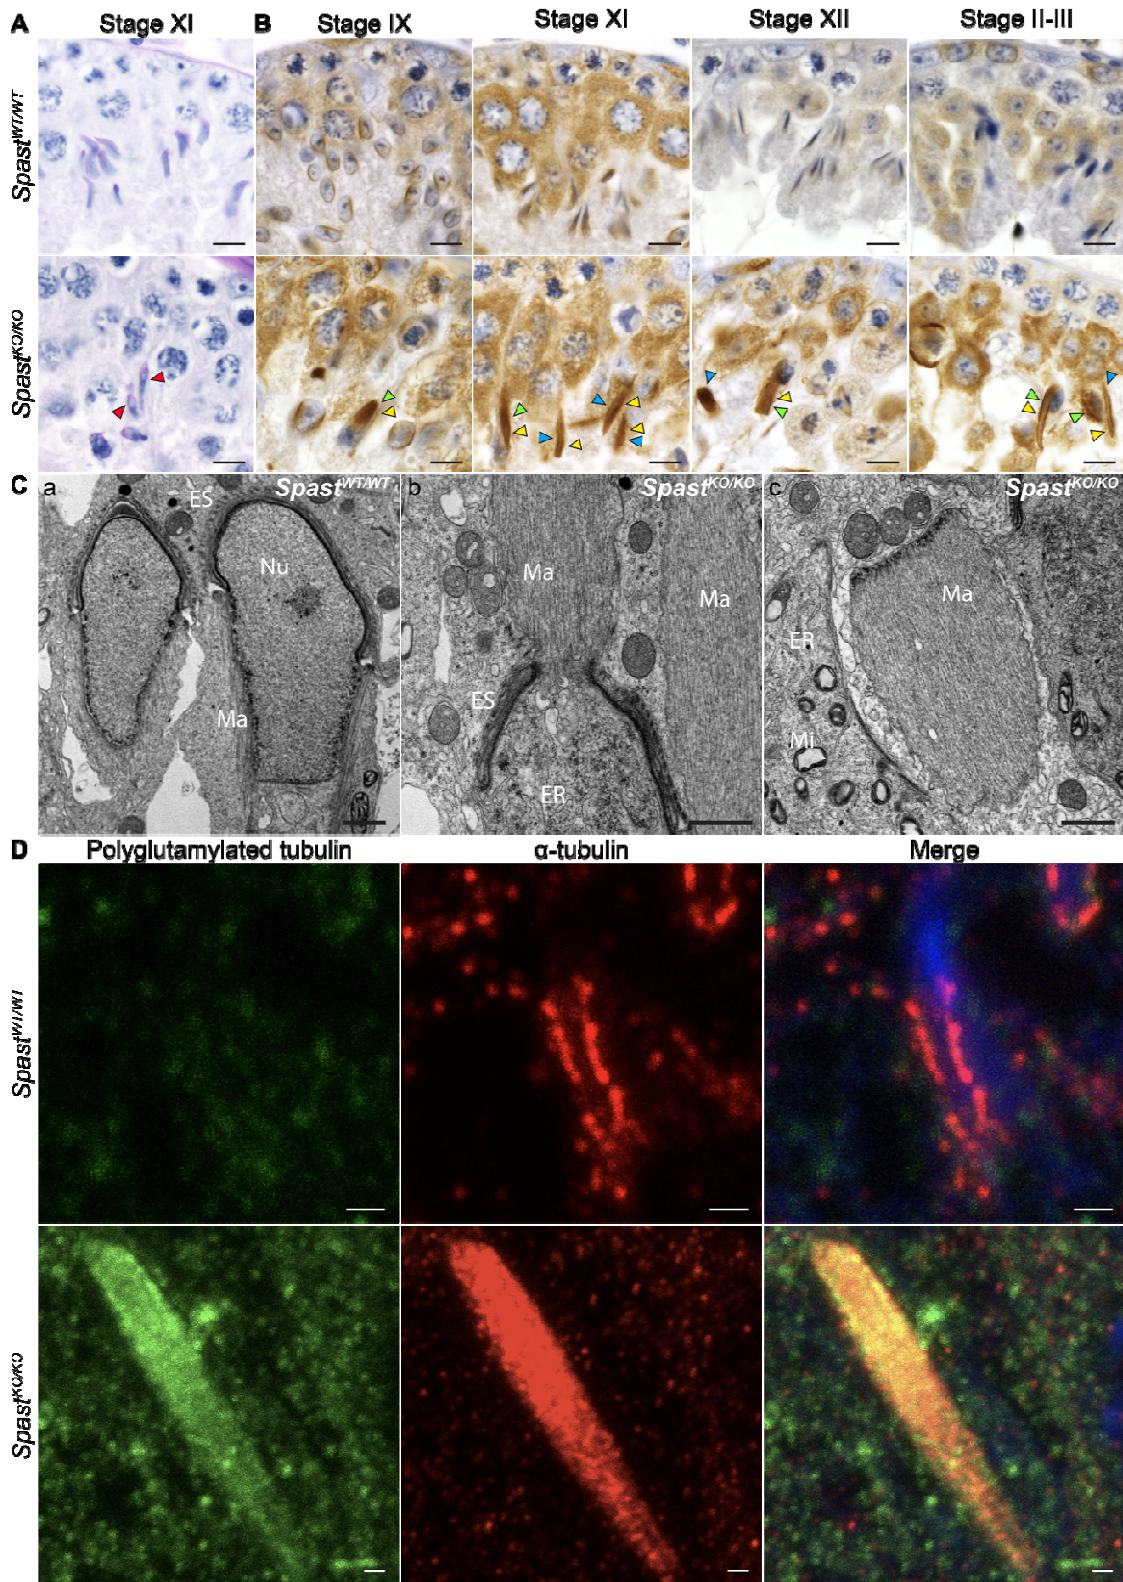

827

828 **Fig. 6: Spastin is a key regulator of manchette structure and dynamics.** (A) PAS-stained  
829 testis sections showing normal elongating spermatids in *Spast*<sup>WT/WT</sup> mice and abnormal

830 elongating spermatids in *Spast*<sup>KO/KO</sup> mouse testes (red arrowheads). **(B)** *Spast*<sup>WT/WT</sup> and  
831 *Spast*<sup>KO/KO</sup> testis sections immunolabelled for  $\alpha$ -tubulin, a core component of microtubules  
832 within the manchette. The tubule stages that capture manchette formation, migration, and  
833 disassembly are shown from left to right. Green and blue arrowheads respectively, indicate  
834 manchettes that have partially or completely dissociated from the nucleus. The blue  
835 arrowheads indicate manchettes of abnormal size. Scale bars of **A-B** = 20  $\mu$ m. **(C)** TEM  
836 showing the manchette ultrastructure in *Spast*<sup>WT/WT</sup> and *Spast*<sup>KO/KO</sup> mice. In panel b, a  
837 manchette dissociating from the nucleus of a spermatid in a *Spast*<sup>KO/KO</sup> male can be observed,  
838 and in panel c a dissociated manchette is shown. Endoplasmic reticulum, ER; Ectoplasmic  
839 specialisation, ES; Manchette, Ma; Mitochondria, Mi; Nucleus, Nu. Scale bars of **C** = 1  $\mu$ m.  
840 **(D)** Immunostaining of manchettes showing an increase in microtubule number (red) and  
841 polyglutamylated tubulin (green) in *Spast*<sup>KO/KO</sup> compared to *Spast*<sup>WT/WT</sup> mice. Nuclei are  
842 counterstained with DAPI (blue). Staining for polyglutamylated tubulin identified an overall  
843 increase in polyglutamylated tubulin in *Spast*<sup>KO/KO</sup> spermatids, especially in the microtubules  
844 of the manchette, consistent with polyglutamylated tubulin being the preferred target for  
845 spastin-mediated microtubule severing. Scale bars of **D** = 1  $\mu$ m.
